## RESEARCH ARTICLE

# Growth control through regulation of insulin signalling by nutrition-activated steroid hormone in *Drosophila*

Kurt Buhler\*, Jason Clements\*, Mattias Winant, Lenz Bolckmans, Veerle Vulsteke and Patrick Callaerts<sup>‡</sup>

## ABSTRACT

Growth and maturation are coordinated processes in all animals. Integration of internal cues, such as signalling pathways, with external cues, such as nutritional status, is paramount for an orderly progression of development and growth. In *Drosophila*, this involves insulin and steroid signalling, but the underlying mechanisms and their coordination are incompletely understood. We show that bioactive 20-hydroxyecdysone production by the enzyme Shade in the fat body is a nutrient-dependent process. We demonstrate that under fed conditions, Shade plays a role in growth control. We identify the trachea and the insulin-producing cells in the brain as direct targets through which 20-hydroxyecdysone regulates insulin signalling. The identification of trachea-dependent regulation of insulin signalling exposes an important variable that may have been overlooked in other studies focusing on insulin signalling in *Drosophila*. Our findings provide a potentially conserved, novel mechanism by which nutrition can modulate steroid hormone bioactivation, reveal an important caveat of a commonly used transgenic tool to study insulin-producing cell function, and yield further insights into how steroid and insulin signalling are coordinated during development to regulate growth and developmental timing.

**KEY WORDS:** *Drosophila*, Ecdysone, Insulin, Growth, Nutrition, Trachea

## INTRODUCTION

Growth and maturation are tightly coordinated processes that result in animals of similar, genetically determined and species-specific adult size. Advances in recent years have revealed remarkable similarities in the mechanisms that coordinate growth and developmental timing of maturation in evolutionarily distant species such as fly and human, with major roles for steroid hormones in maturation and insulin signalling in growth (Brogiolo et al., 2001; Rulifson et al., 2002; Colombani et al., 2005; Kaplowitz, 2008; Stipp, 2011; Wagner et al., 2012; Rewitz et al., 2013; Nässel and Vanden Broeck, 2016; Li et al., 2017). Growth and time to maturation universally depend on nutrient availability. With adequate growth and energy storage, maturation is promoted. Likewise, when insufficient energy has been accumulated, antagonistic signals must block the onset of developmental transitions to allot more time for feeding, growth and, therefore,

energy accumulation (Ikeya et al., 2002; Tennessen and Thummel, 2011; Danielsen et al., 2013; Rewitz et al., 2013; Koyama and Mirth, 2016). Throughout development, humoral signals intersect in different tissues to coordinate and balance growth and the onset of developmental transitions (Mirth et al., 2005, 2009; Danielsen et al., 2013; Droujinine and Perrimon, 2016), but how this integration occurs and the factors involved are incompletely understood.

The fruit fly *Drosophila melanogaster* is a genetically tractable model in which to address these questions. In *Drosophila*, juvenile development is marked by a period of exponential growth during the three larval stages or instars (L1-L3), prior to maturation onset. Maturation corresponds to the pupal stage, when the larva metamorphoses into the adult fly and attains its final body and appendage size.

Maturation is regulated in *Drosophila* by the steroid 20-hydroxyecdysone (20E). Its precursor, ecdysone, is produced in the prothoracic gland (PG) starting from cholesterol. Ecdysone is released into the haemolymph and hydroxylated by the CYP450 enzyme Shade in peripheral tissues to yield the bioactive 20E. The majority of this bioactivation occurs in the *Drosophila* fat body (FB), the functional equivalent of the mammalian liver and adipose tissue (Petryk et al., 2003). 20E is next released and taken up by other tissues and cell types, where it binds a heterodimer of the Ecdysone Receptor (EcR) and Ultraspiracle (Usp) to mediate 20E signalling and transcriptional events via a temporally defined cascade of downstream nuclear receptors (King-Jones and Thummel, 2005; Parvy et al., 2014). Thus, the control of 20E signalling dictates the timing of developmental transitions. However, the observations that 20E can inhibit systemic growth but also promote tissue-autonomous growth in the imaginal discs indicate that the regulation and physiological function of 20E is more complex and diverse depending on tissue, time point and hormone concentration (Terashima et al., 2005; Delanoue et al., 2010; Rewitz et al., 2013; Yamanaka et al., 2013; Herboso et al., 2015).

Growth in *Drosophila* is facilitated by the insulin-like peptides (*Drosophila* ILPs, or Dilps), primarily Dilp2, -3 and -5 (Ilp2, -3 and -5 – FlyBase), secreted by the insulin-producing cells (IPCs) in the larval brain (Ikeya et al., 2002; Rulifson et al., 2002). The Dilps are released into the haemolymph and bind a single insulin receptor (InR) to activate the highly conserved insulin and insulin-like growth factor signalling (IIS) cascade (Brogiolo et al., 2001). Reducing systemic IIS either by ablating the IPCs or removing key effectors results in a decreased growth rate, developmental delay and metabolic dysfunction, characterized by a ‘diabetic-like’ phenotype (Grönke et al., 2010; Ikeya et al., 2002; Rulifson et al., 2002; Zhang et al., 2009). Changes in the growth rate or in growth period length (time to maturation) during larval life result in adults with altered body size (Shingleton et al., 2005).

Growth rates and growth period lengths are both highly sensitive to changes in nutritional information. A number of nutrient-sensing mechanisms exist that regulate IIS from the IPCs. Chief among

Laboratory of Behavioral and Developmental Genetics, Department of Human Genetics, KU Leuven-University of Leuven, Herestraat 49, Box 602, B-3000 Leuven, Belgium.

\*These authors contributed equally to this work

<sup>‡</sup>Author for correspondence (patrick.callaerts@kuleuven.be)

 P.C., 0000-0003-4530-4561

these are nutrient-responsive FB-derived signals, which are released into the haemolymph in response to nutrients to regulate IIS. Such signals include the recently identified Stunted, CCHamide-2, Neural Lazarillo, Eiger, Upd2, and growth-blocking peptides that promote or inhibit IIS from the IPCs (Pasco and Léopold, 2012; Rajan and Perrimon, 2012; Sano et al., 2015; Agrawal et al., 2016; Delanoue et al., 2016; Koyama and Mirth, 2016). Both expression and release of all three IPC Dilps are nutritionally regulated, not only via FB signals but also through other signals emanating from glia (Okamoto and Nishimura, 2015) or corpora cardiaca (Kim and Neufeld, 2015). These signals form a complex and dynamic regulatory network that converges on the IPCs and coordinates growth with nutritional status.

This regulation must also be integrated at the level of developmental timing via 20E. Nutrients regulate ecdysone biosynthesis in the prothoracic gland directly, via TOR signalling and control of endoreplication (Layalle et al., 2008; Ohhara et al., 2017), and indirectly, via IPC-derived IIS, which controls both PG size and transcription of ecdysone biosynthesis genes (Colombani et al., 2005; Layalle et al., 2008; Ohhara et al., 2017). Reciprocally, peripheral regulation of IIS by 20E has been demonstrated via 20E-sensitive signals such as Dilp6, which inhibits IPC Dilp2 and Dilp5, and 20E-mediated inhibition of *Myc* (Bai et al., 2012; Delanoue et al., 2010). However, it can be expected that additional layers of regulation, as well as additional factors, contribute to the coordination of growth and maturation.

Given the fact that (1) the FB is the central nutrient-sensing organ, (2) *shade* is expressed in the FB, and (3) other ecdysone biosynthetic enzymes expressed in the PG are nutrient sensitive, we hypothesized that *shade* expression in *Drosophila*, and therefore 20E bioactivation, is regulated in a nutrient-dependent manner. We further hypothesized that 20E signalling would be directly required in the IPCs, either to promote IIS as in imaginal discs, or to inhibit growth as in the FB (Delanoue et al., 2010).

Here, we show that *shade* expression and 20E synthesis and, thus, bioactivation are nutrient dependent. During starvation, FB *shade* expression is strongly reduced, and animals are unable to undergo pupation. This failure to undergo pupation was rescued by supplementing steroid hormone, with 20E being more efficient than ecdysone. The knockdown of *shade* in the FB resulted in reduced systemic growth and perturbation of both Dilp gene expression and Dilp release from the IPCs. We next showed that Ecdysone Receptor (EcR) is expressed in the larval IPCs, and that knock down or perturbation of EcR using the commonly used IPC GAL4 driver line *Dilp2-GAL4<sup>R</sup>* results in extreme growth and metabolic defects reminiscent of starvation. We show that these phenotypes are due to Dilp2 retention and loss of *Dilp3* and *Dilp5* expression. A detailed analysis of the spatiotemporal expression pattern of *Dilp2-GAL4<sup>R</sup>* revealed that it is not only expressed in the IPCs but also in the trachea. The strong IIS reduction is the combined effect of 20E perturbation in trachea and IPCs, with the most prominent contribution from the trachea. We also provide evidence that the trachea may itself be a source of *Dilp2*. Finally, we demonstrate a role for 20E in regulating growth and IIS using IPC-specific manipulations.

Our data contribute to our understanding of how growth and maturation are coordinated and we identify three additional regulatory levels at which nutritional cues are integrated in the insulin-steroid regulatory network. Key peripheral tissues, such as the FB and trachea, produce signals that are integrated at central promoters of growth and maturation (insulin- and steroid-producing tissues, respectively), which in turn communicate with one another directly.

## RESULTS

### Conversion of ecdysone to 20-hydroxyecdysone is nutrient dependent

Ecdysone is synthesized in the PG starting from cholesterol by the action of enzymes encoded by *neverland*, *spookier*, *shroud*, *phantom*, *disembodied* and *shadow*, collectively known as members of the Halloween gene family (Chavez et al., 2000; Warren et al., 2002, 2004; Ono et al., 2006; Yoshiyama et al., 2006; Niwa et al., 2010). A final Halloween gene, *shade*, encodes the CYP450 E20-monoxygenase that is expressed in the FB, the primary nutrient-sensing organ, where it converts ecdysone to the bioactive 20E (Fig. 1A; Petryk et al., 2003). We first investigated whether *shade* expression is nutrient sensitive. To test this, we conducted starvation experiments at 72 h after egg laying (h AEL) and compared *shade* expression between fed and starved larvae 24 h later (Fig. 1B). This resulted in a significant reduction of detectable *shade* expression levels in FB but not gut, another tissue in which *shade* is expressed. A comparable decrease of *shade* transcript levels was observed upon knockdown of the amino acid transporter *slimfast* (*slif*) in the FB (Fig. 1C). This indicates that *shade* regulation in the FB is nutrient dependent and amino acid sensitive.

Next, we hypothesized that in starved animals, ecdysone bioactivation to 20E would be reduced. To test this, we examined the potential of 20E and ecdysone to rescue maturation onset in starved animals. Normally, animals starved from 72 h AEL onward fail to undergo maturation onset, a phenotype that can be rescued by supplementation of 20E hormone (Ohhara et al., 2017; Parvy et al., 2014; Yamanaka et al., 2015). The starved controls did not undergo maturation, and supplementation of 20E rescued maturation onset (Fig. 1D). Ecdysone supplementation also rescued maturation onset, albeit much less efficiently than 20E. Supplementation of 20E and ecdysone to fed animals induced precocious pupariation, recapitulating earlier observations (Ou et al., 2011; Ono, 2014; Herboso et al., 2015). We observed no significant differences between 20E and ecdysone supplementation in inducing precocious pupariation consistent with normal conversion of ecdysone to 20E under fed conditions. Note that hormone supplementation induces pupariation in starved animals earlier than in fed animals (Fig. 1D). Finally, we knocked down *shade* in the FB using the *pumpless* (*ppl*)-*GAL4* driver, which resulted in significantly reduced total *shade* expression levels and a developmental delay of about 6 h in maturation onset (Fig. 1E,F). The effect on growth rates of FB *shade* knockdown was confirmed using a second RNAi line (Fig. S1A,E). The results on maturation onset were recapitulated when knocking down *shade* with a second FB GAL4 driver, *cg-GAL4* (Fig. S2A). Taken together, these results demonstrate that *shade* expression, and therefore 20E bioactivation, is nutrient dependent, thus identifying a novel mechanism by which nutritional status is coordinated with steroid biosynthesis and developmental timing.

### 20-hydroxyecdysone, *shade* and growth control

We observed that knockdown of *shade* in the FB resulted in animals with significantly impaired growth rates. This observation was recapitulated with *cg-GAL4*, and was not due to the *shade* RNAi line alone (Fig. 2A,B). This suggested a role for FB *shade* in regulating not only maturation onset, but also growth.

Recent studies have identified a number of non-autonomous FB-derived signals that regulate IIS and growth via the brain IPCs (Pasco and Léopold, 2012; Rajan and Perrimon, 2012; Sano et al., 2015; Agrawal et al., 2016; Delanoue et al., 2016; Koyama and Mirth, 2016). These factors exhibit nutrient-dependent expression

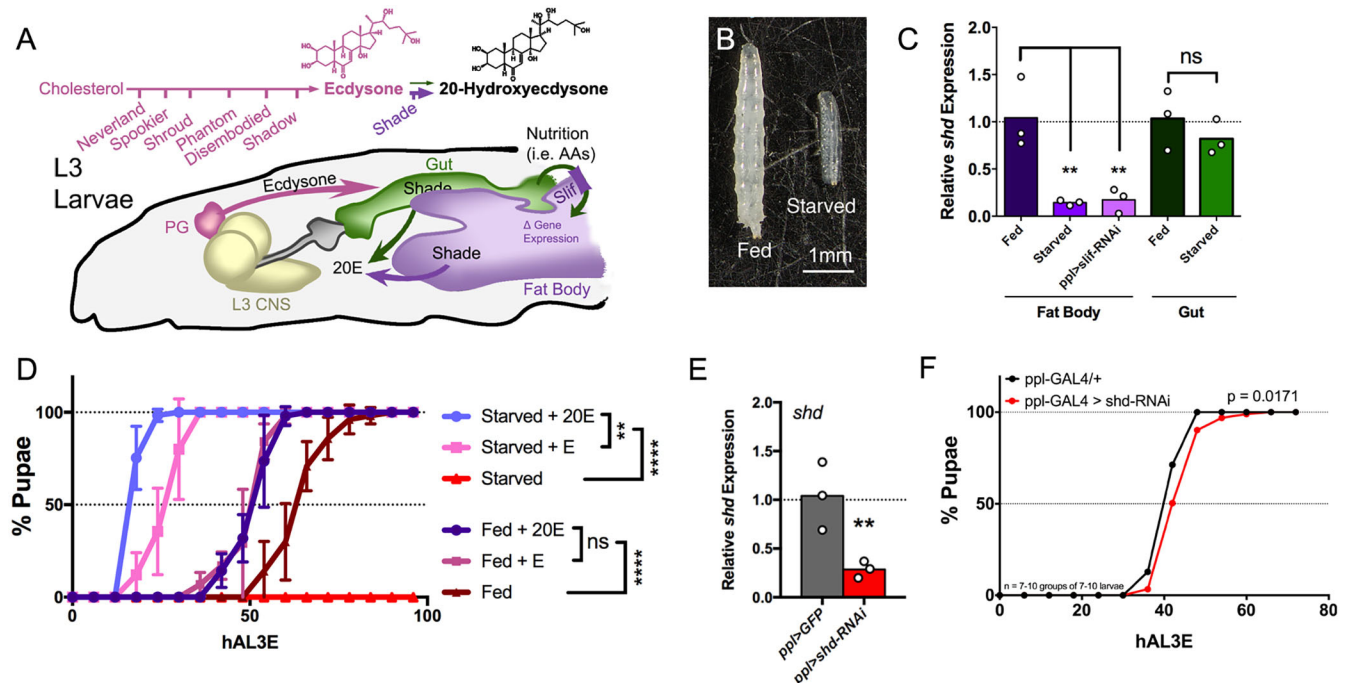

**Fig. 1. 20E bioactivation and *shade* FB expression are nutrient dependent.** (A) During larval development, cholesterol is converted into ecdysone in the PG by a cascade of nutrient-sensitive CYP450 enzymes before being released into circulation. Thereafter, ecdysone is bioactivated by Shade in the gut and FB before being re-released as 20E. Nutrients from larval feeding are transported from the gut to the FB via transporters, such as the amino acid (AA) transporter Slimfast (Slif). (B) Example larva starved from 72 to 96 h AEL, shown at 96 h AEL, compared with a time-matched fed control. (C) Starving larvae or knocking down the amino acid transporter *slif* resulted in reduced *shade* expression in the FB (\*\* $P < 0.01$ , ANOVA;  $n = 3$ ). Gut *shade* was unaffected by starvation ( $P > 0.05$ , one-tailed, unpaired *t*-test,  $n = 3$ ). RNA was collected from FBs or gut dissected from larvae after 24 h starvation and time-matched fed controls and measured by qPCR. (D) Starved larvae do not undergo maturation onset, a phenotype rescued by supplementing 20E or ecdysone (E) at 1 mg/ml (\*\* $P < 0.01$ , \*\*\*\* $P < 0.0001$ , ANOVA;  $n = 5$  starved groups,  $n = 4$  starved 20E/E supplementation groups,  $n = 12$  fed groups,  $n = 5$  fed 20E/E supplementation groups; mean  $\pm$  s.d. shown). The difference in precocious maturation induction between 20E and E was observed during starvation, but not during fed conditions, where pupariation was also induced later than during starvation. The time to pupation of surviving larvae is plotted as a percentage of total animals. The time to reach 100% pupation was compared between conditions. (E) Knockdown of *shade* in the FB resulted in significantly reduced total body *shade* levels in whole pupae. RNA was collected from time-matched pupae and *shade* levels measured by qPCR (\*\* $P < 0.01$ , ANOVA;  $n = 3$ ). (F) Knockdown of *shade* in the FB resulted in significantly delayed maturation onset by about 6 h ( $P < 0.05$ , one-tailed, unpaired *t*-test;  $n = 7$  *ppl-GAL4*+,  $n = 10$  *ppl-GAL4 > shd-RNAi*). ns, not significant.

in the FB and contribute to regulation of either expression or release of the three IPC-derived Dilps, Dilp2, Dilp3 and/or Dilp5. Thus, we tested whether insulin output from the IPCs was compromised in animals with reduced FB *shade*. These animals were smaller than controls (Fig. 2C) and exhibited perturbed Dilp gene levels, marked by significant reductions in transcript levels of *Dilp3* and a retention of Dilp2 in the IPC cell bodies (Fig. 2D-H; Fig. S1B-D; Fig. S2B). IPC Dilp3 protein levels in the IPCs were not different. Given that *Dilp3* transcript levels were reduced, this suggests that Dilp3 may also be retained.

Upon starvation, Dilp expression is reduced in the IPCs. We tested whether overexpressing *shade* in the FB could rescue starvation-induced Dilp reductions. Surprisingly, during starvation, *shade* overexpression resulted in increased weight, a difference that disappeared after desiccation, suggesting that *shade* overexpression led to larval water retention in starved larvae (Fig. S2C-G). *shade* overexpression in the FB and the gut of starved larvae did rescue starvation-dependent *Dilp3* reductions, but did not substantially affect *Dilp2* or *Dilp5* levels, suggesting that *shade* is sufficient for *Dilp3* expression during starvation (Fig. S2H-S). Feeding 20E to starved animals gave a more complex readout with significant increases in *Dilp3* and *Dilp5*, but a decrease in *Dilp2* (Fig. S2Q-S). In summary, we show that FB *shade* regulates larval growth rates and Dilp expression in IPCs.

### Targeted disruption of 20E signalling results in severe growth and metabolic defects due to reduced IIS

Based on our results, we hypothesized that 20E has a direct effect on IPCs. To address this, we focused on EcR and used immunohistochemistry with a specific antibody to determine whether EcR is expressed in larval IPCs. During the larval stages, the IPCs comprise two clusters of seven cells, one in each brain hemisphere, with proximal neurites and a descending axon bundle, which exits the brain via the oesophageal foramen (Fig. 3A). Antibodies directed against EcR revealed expression in the IPCs of L3 larvae, which were marked by expression of a *UAS-sytGFP* (Zhang et al., 2002) driven by *Dilp2-GAL4<sup>R</sup>*, a commonly used *Dilp2-GAL4* line (Fig. 3B-B'') (Rulifson et al., 2002). Furthermore, expression of an EcR-response element-controlled *lacZ* reporter gene (*EcRE-lacZ*) was detected in the larval IPCs, consistent with 20E signalling being active in these cells (Fig. 3C-C'').

In order to investigate the function of 20E in the IPCs, we disrupted EcR function by using *Dilp2-GAL4<sup>R</sup>* to express a dominant-negative form of the B1 isoform of EcR (EcR<sup>B1[DN]</sup>) in IPCs, or by downregulation of *EcR* transcript using transgenic RNA interference (RNAi) (Brown et al., 2006; Schubiger et al., 2005). Perturbing 20E signalling in the IPCs resulted in significantly reduced larval growth rates from late L2 throughout L3 and a strong delay in maturation onset (Fig. 3D-G). Animals that survived

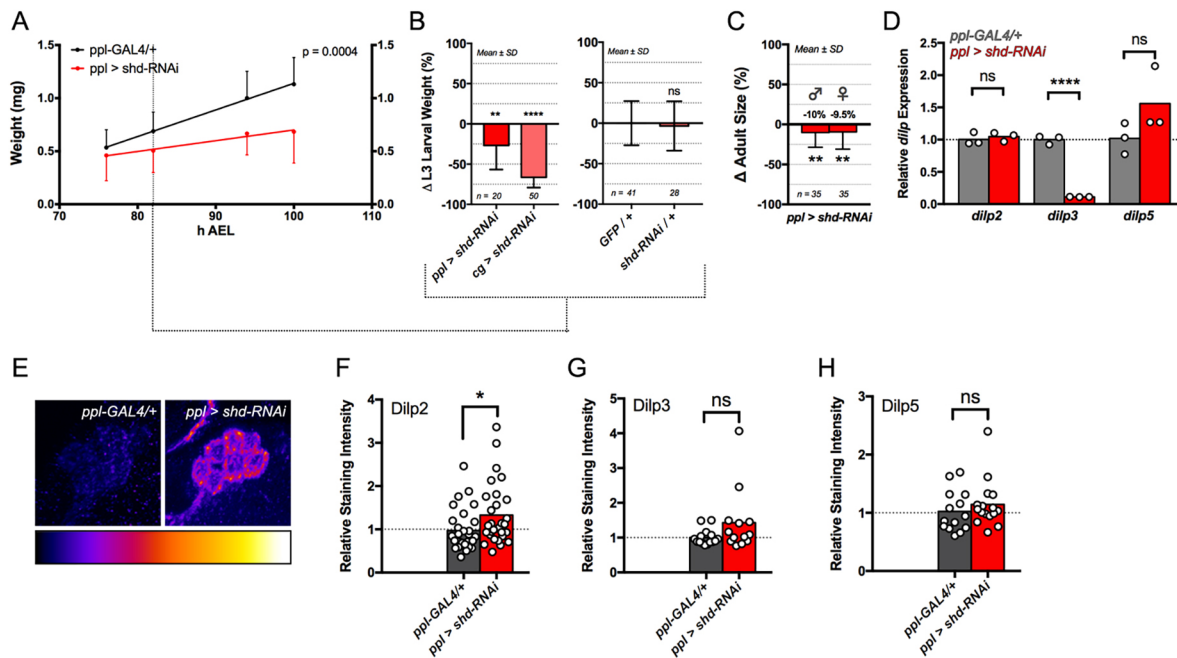

**Fig. 2. Knockdown of *shade* in the FB results in reduced larval growth rates and perturbed Dilp gene expression and Dilp retention in the brain IPCs.** (A) Knockdown of *shade* resulted in reduced larval growth rates compared with GAL4 alone (mean larval weight  $\pm$  s.d.,  $P=0.0004$ , ANCOVA;  $n=26$  *ppl-GAL4/+*,  $n=25$  *ppl-GAL4>shd-RNAi*). Larvae were collected at 72 h AEL, then weighed every 6 or 12 h. Raw data points were plotted and a linear regression fit to these raw data. Mean weights are plotted with this linear regression. Slopes of the linear regressions were statistically compared. (B) Knockdown of *shade* using *cg-GAL4* recapitulated the reduced growth phenotype (\*\* $P<0.05$ , \*\*\*\* $P<0.0001$ , one-tailed, unpaired *t*-test;  $n=20$  *ppl-GAL4>shd-RNAi*,  $n=50$  *cg-GAL4>shd-RNAi*), whereas the *shade-RNAi* alone did not result in reduced growth ( $P>0.05$ , one-tailed, unpaired *t*-test;  $n=41$  *GFP/+*,  $n=28$  *shd-RNAi/+*; mean  $\pm$  s.d.). Larvae were weighed at 84 h AEL and compared with *cg-GAL4/+* larvae. (C) Eclosed adult *ppl-GAL4>shade-RNAi* flies were significantly smaller than *ppl-GAL4/+* flies reared in controlled densities (\*\* $P<0.01$ , one-tailed, unpaired *t*-test;  $n=35$ ). Flies were weighed between 3 and 7 days old without exposure to  $\text{CO}_2$  to prevent desiccation. (D) Knockdown of *shade* in the FB reduced *Dilp3* but not *Dilp2* or *Dilp5* expression (\*\*\*\* $P<0.0001$ , one-tailed, unpaired *t*-test;  $n=3$ ). RNA was collected from whole *ppl-GAL4>shade-RNAi* and *ppl-GAL4/+* larvae at 84 h AEL and measured by qPCR. (E–H) Knockdown of *shade* in the FB resulted in retention of Dilp2 (F; \* $P<0.05$ , one-tailed, unpaired *t*-test;  $n=29$ ). Increased Dilp2 staining is seen in *ppl-GAL4>shd-RNAi* compared with *ppl-GAL4/+* controls (E). No differences in Dilp3 (G) or Dilp5 (H) staining intensity were observed in *ppl-GAL4>shade-RNAi* compared with *ppl-GAL4/+* IPCs ( $P>0.05$ , one-tailed, unpaired *t*-test;  $n=15$  Dilp2 *ppl-GAL4/+*,  $n=13$  Dilp2 *ppl-GAL4>shd-RNAi*,  $n=14$  Dilp5 *ppl-GAL4/+*,  $n=16$  Dilp5 *ppl-GAL4>shd-RNAi*). ns, not significant.

metamorphosis eclosed into adult flies with a greater than 50% reduction in weight compared with control sibling flies, which were reared in identical nutritive and crowding conditions (Fig. 3H,I).

Despite being able to feed and process food normally, these larvae were leaner (Fig. 3J) and exhibited clear energy storage defects, as exemplified by their near-transparent FBs compared with FBs taken from control siblings reared in identical environmental conditions (Fig. 3K). Triglyceride levels and lipid content of these fat bodies were substantially reduced (Fig. 3L). The cells of the FBs were also markedly smaller, which, together with the metabolic and growth defects, is consistent with a reduced IIS phenotype (Fig. 3M).

Energy homeostasis and lipid metabolism are altered upon reduction of systemic IIS (DiAngelo and Birnbaum, 2009; Grönke et al., 2010; Zhang et al., 2009). In *Drosophila*, like in other animals, IIS promotes energy storage and lipid synthesis (Wilcox, 2005; DiAngelo and Birnbaum, 2009; Zheng et al., 2016). Hallmarks of reduced IIS include not only reduced energy stores and smaller cells and body size, but also nuclear localization of FoxO and increased expression of the FoxO target genes *Thor* (*4E-BP*) and *InR* (Chen et al., 1996; Jünger et al., 2003). To confirm that IIS levels are reduced in *Dilp2-GAL4<sup>R</sup>>EcR<sup>B1[DN]</sup>* larvae, we analysed nuclear localization of FoxO in the FBs and quantified expression of the FoxO targets *Thor* and *InR*. Staining for FoxO revealed a significant reduction of cytoplasmic FoxO in *Dilp2-GAL4<sup>R</sup>>EcR<sup>B1[DN]</sup>* FBs compared with the FBs of *Dilp2-GAL4<sup>R</sup>/+*; *syGFP/+* controls reared in identical nutritive and

crowding conditions. This reduction is similar to observations in starved animals (Fig. 3M–P).

Next, we sought to determine whether IPC output was disrupted in *Dilp2-GAL4<sup>R</sup>>EcR<sup>B1[DN]</sup>* animals. We quantified *Dilp2*, *Dilp3* and *Dilp5* larval transcript levels and staining intensity of Dilp protein in the IPCs. This revealed a clear reduction of *Dilp3* and *Dilp5* transcript (Fig. 3R,S) and protein (not shown), whereas *Dilp2* transcript levels were not significantly different than that of control siblings (Fig. 3Q), Dilp2 protein was retained in the cell bodies (Fig. 3T). Taken together, these results demonstrate that *Dilp2-GAL4<sup>R</sup>>EcR<sup>B1[DN]</sup>* animals exhibit significantly reduced growth and metabolic storage defects as a result of reduced insulin output from the IPCs and reduced systemic IIS.

### Growth and metabolic phenotypes depend on signals from the trachea and IPCs

The results obtained with *Dilp2-GAL4<sup>R</sup>*-mediated perturbation of 20E signalling suggested a potentially significant contribution of nutrient-dependent 20E signalling to IPC function in growth regulation. However, several anomalies led us to revisit these results. In particular, the observed size phenotypes were comparable to IPC-ablation studies, and more severe than those reported in Dilp mutant studies. Of note, even among these studies, there are considerable differences in the reported phenotypes between groups and publications (Grönke et al., 2010; Ikeya et al., 2002; Rulifson et al., 2002; Zhang et al., 2009). To further define the role of

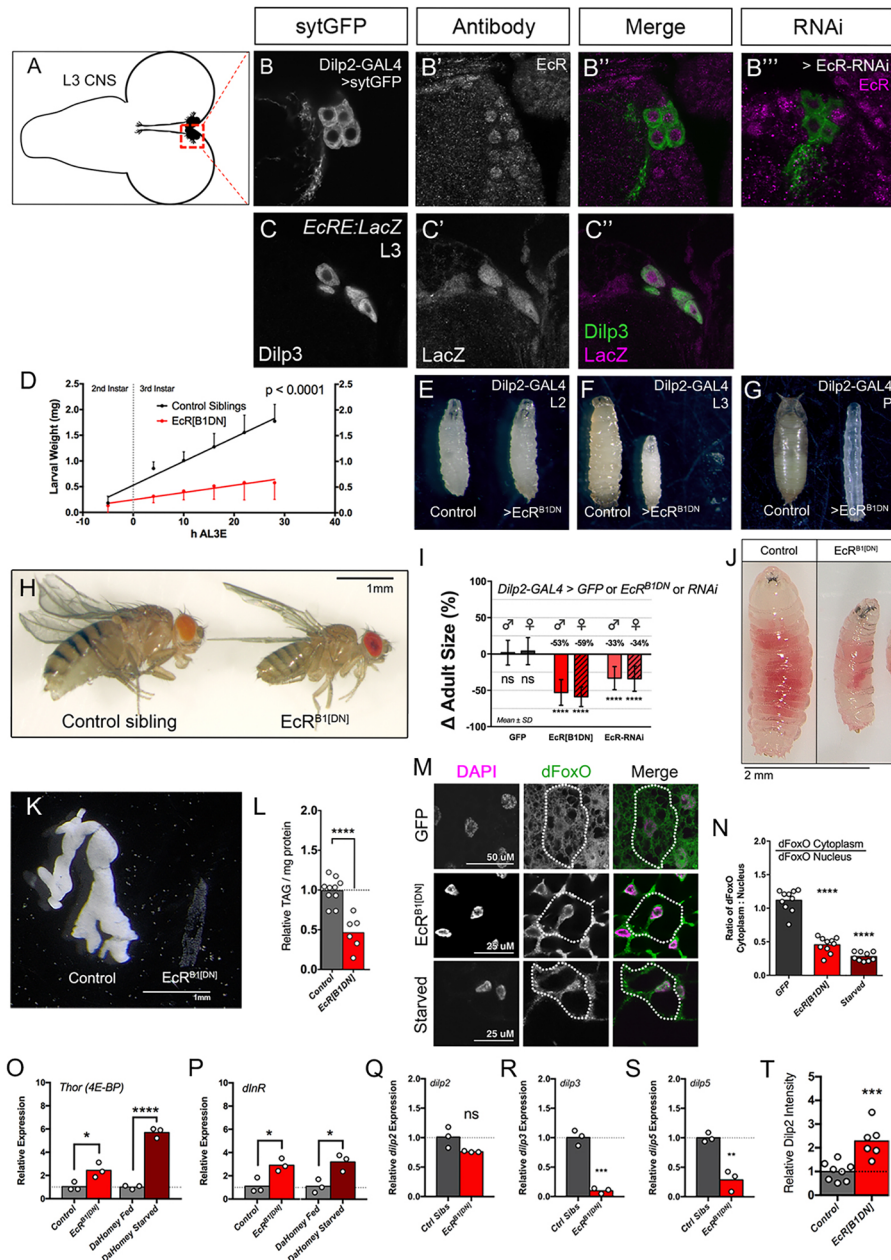

**Fig. 3. Perturbation of EcR signalling in IPCs leads to growth and metabolic defects as a result of reduced IIS.** (A) The IPCs of *Drosophila* L3 CNS are organized as two clusters of seven neurons (dashed box). (B-B'') Antibody staining for EcR was observed in the IPCs of *Dilp2-GAL4>syGFP* L3 larvae, and IPC expression was markedly reduced using an *EcR-RNAi*. (C-C'') Expression of an EcR response element-controlled *lacZ* reporter in larval IPCs co-labelled with anti-Dilp3 antibody. (D) Larval growth rates were substantially reduced in *Dilp2-GAL4<sup>R</sup>>EcR<sup>B1DN</sup>* larvae from late L2 and throughout L3 compared with *EcR<sup>B1DN</sup>/CyO* control siblings (mean larval weight $\pm$ s.d.;  $n=7$  control siblings,  $n=6$  *EcR<sup>B1DN</sup>*). The linear regression was determined with raw weights and is plotted with the mean weight measurements. (E-G) The size phenotype of *Dilp2-GAL4>UAS-EcR<sup>B1DN</sup>* larvae is observed by early third instar (L3) (F). By the end of L3, smaller larvae were leaner and exhibited a clear delay in maturation onset (G; quantified in Fig. S3A). (H,I) Overexpression of *EcR<sup>B1DN</sup>* and genetic knockdown of EcR using *Dilp2-GAL4<sup>R</sup>* resulted in smaller adult flies compared with control siblings lacking *Dilp2-GAL4<sup>R</sup>* reared in identical environmental conditions (mean difference in weight $\pm$ s.d.; \*\*\*\* $P<0.0001$ , one-tailed, unpaired *t*-test). Expression of a *syGFP* alone did not affect adult size (mean difference in weight $\pm$ s.d.;  $P>0.05$ , one-tailed, unpaired *t*-test;  $n=50$  GFP,  $n=26$  male, 21 female *EcR<sup>B1DN</sup>*,  $n=19$  male 34 female *EcR-RNAi*). Expression of *EcR<sup>B1DN</sup>* using *Dilp2-GAL4<sup>R</sup>* did not affect feeding, yet the same animals displayed a leaner body type (J) and non-autonomous FB defects, with smaller, transparent FB tissues (K) compared with control siblings lacking *Dilp2-GAL4<sup>R</sup>*. The FB of a *Dilp2-GAL4<sup>R</sup>>EcR<sup>B1DN</sup>* L3 larva and control sibling (*CyO*; *EcR<sup>B1DN</sup>*) is shown. (L) These animals also exhibited significantly reduced TAG levels (\*\*\*\* $P<0.0001$ , one-tailed unpaired *t*-test;  $n=10$  control,  $n=6$  *EcR<sup>B1DN</sup>*). (M) The nucleocytoplasmic distribution of FoxO was changed in *Dilp2-GAL4<sup>R</sup>>EcR<sup>B1DN</sup>* and in starved animals with reduced cytoplasmic staining and increased nuclear FoxO. (N-P) A significant reduction in cytoplasmic FoxO is observed upon expression of *EcR<sup>B1DN</sup>* using *Dilp2-GAL4<sup>R</sup>* (\*\*\*\* $P<0.0001$ , one-tailed, unpaired *t*-test,  $n=10$ ), and resulted in significantly increased expression of the FoxO target genes *thor* (O) and *InR* (P) (\* $P<0.05$ , one-tailed, unpaired *t*-test,  $n=3$ ), comparable to similar phenotypes observed in starved animals. *thor* and *dInR* levels of *Dilp2-GAL4<sup>R</sup>>EcR<sup>B1DN</sup>* larvae were compared with respective control siblings. As a positive control, expression of *thor* and *InR* in *Dahomey w* larvae starved for 24 h on a 1% non-nutritive agar plate were compared with fed larvae of the same genotype (\* $P<0.05$ , \*\*\*\* $P<0.0001$ , one-tailed, unpaired *t*-test,  $n=3$ ). (Q-S) *Dilp2-GAL4<sup>R</sup>>EcR<sup>B1DN</sup>* larvae exhibited significant reductions of *Dilp3* and *Dilp5* (\*\* $P<0.01$ , \*\*\* $P<0.001$ , one-tailed, unpaired *t*-test,  $n=3$ ), but not *Dilp2* ( $P>0.05$ , one-tailed, unpaired *t*-test,  $n=3$ ). (T) Quantification of Dilp2 levels in *Dilp2-GAL4>EcR<sup>B1DN</sup>* IPC cell bodies demonstrated a significant retention of Dilp2 compared with respective control siblings (\*\*\* $P<0.001$ , one-tailed, unpaired *t*-test,  $n=8$  control,  $n=6$  *Dilp2-GAL4>EcR<sup>B1DN</sup>*). ns, not significant.

ecdysone signalling in IPCs, we first characterized in detail the spatiotemporal expression pattern of the *Dilp2-GAL4<sup>R</sup>*-driver. Starting from late embryonic stages and throughout larval development, the *Dilp2-GAL4<sup>R</sup>* driver showed expression in the IPCs and salivary glands (Fig. S3). Disruption of the salivary glands does not affect IPC development or function (Rulifson et al., 2002). We further characterized *Dilp2-GAL4<sup>R</sup>* spatiotemporal activity using a recently described Gal4 technique for real-time and clonal expression (G-TRACE) (Evans et al., 2009). This works using

*Dilp2-GAL4<sup>R</sup>* to drive expression of an NLS-RFP and a recombinase to flip out a STOP cassette between a ubiquitous *p63* promoter and NLS-GFP. Thus, NLS-RFP expression marks current GAL4 activity, whereas NLS-GFP expression marks transient, past GAL4 activity prior to when samples were collected for imaging (Fig. 4A; Evans et al., 2009). Using this technique, we found that the *Dilp2-GAL4<sup>R</sup>* driver is active not only in the IPCs and salivary glands, but also in the trachea. In all dissected animals, *Dilp2-GAL4<sup>R</sup>* and its corresponding line from the Bloomington *Drosophila* Stock Center (BDSC),

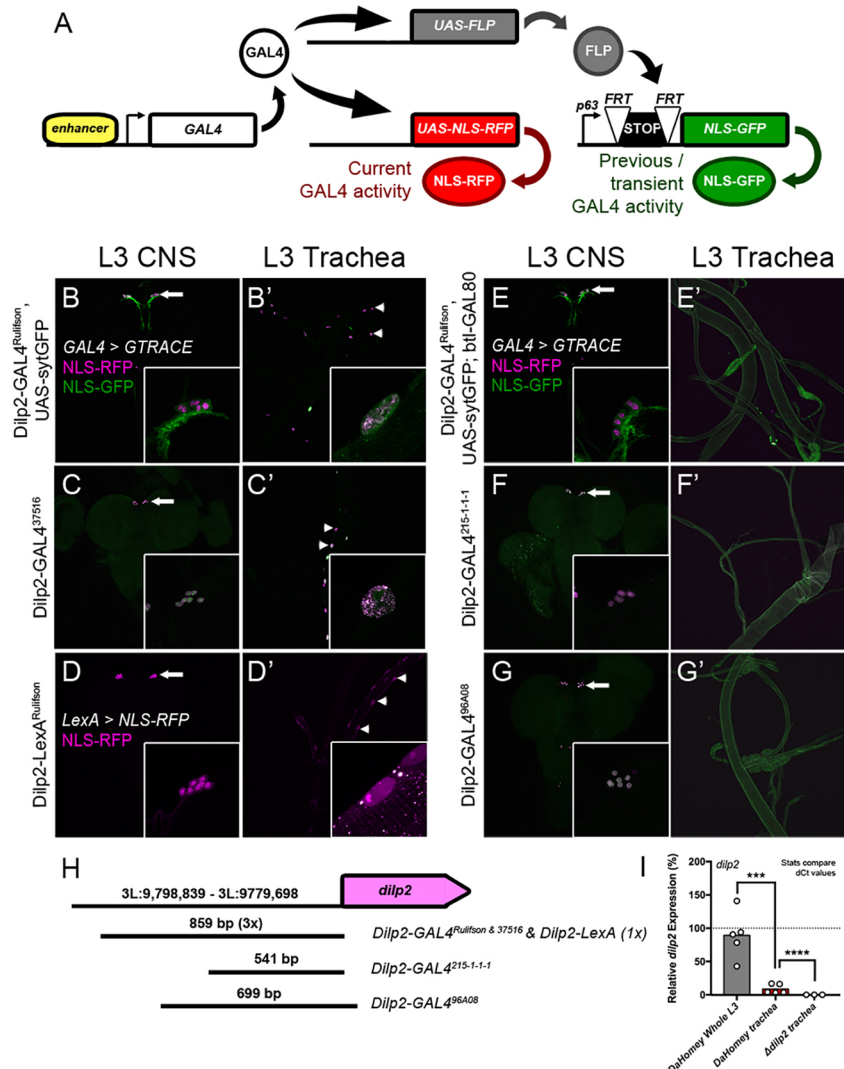

**Fig. 4. Commonly used *Dilp2-GAL4* drivers exhibit strong tracheal activity that may reflect endogenous *Dilp2* expression.** (A) The G-TRACE system allows identification of both current and past GAL4 activity. When combined with an enhancer-driven GAL4, the GAL4 drives expression of an NLS-RFP, which marks current activity, and a Flippase (FLP). FLP is a recombinase that will loop and recombine out a STOP cassette between a ubiquitous *p63* promoter and NLS-GFP. Thus, cells with GAL4 activity and all future daughter cells will be GFP positive, marking transient GAL4 activity. (B,B') Combining *Dilp2-GAL4<sup>R</sup>* with the G-TRACE system results in labelled IPCs (arrows) and tracheal nuclei (arrowheads). IPC soma, neurites and axons are also labelled due to a *UAS-sytGFP* present in the stock. (C,C') *Dilp2-GAL4<sup>37516</sup>*, which contains the same insertion as *Dilp2-GAL4<sup>R</sup>*, also drives expression in both IPCs and trachea. (D,D') Cloning a single copy of the 859 bp enhancer (corresponding to the fragment used as trimer in *Dilp2-GAL4<sup>R</sup>*) into the LexA/LexAop system resulted in a *Dilp2-LexA*, which also drove expression of an NLS-RFP in both IPCs and trachea. (E,E') Tracheal activity of *Dilp2-GAL4<sup>R</sup>* is abolished when combined with a *btl-GAL80*. (F-G') Both *Dilp2-GAL4<sup>215-1-1-1</sup>* and *Dilp2-GAL4<sup>96A08</sup>* drive expression in the IPCs, but not the trachea. Trachea are easily visible in E', F' and G' owing to autofluorescence. *Dilp2-GAL4*>G-TRACE or *LexA*>NLS-GFP larvae were collected at wandering L3. All tissues were mounted without immunohistochemical staining and imaged. (H) Schematic of the *Dilp2* regulatory sequences used in the different *Dilp2-GAL4* driver lines. Insertions from common *Dilp2-GAL4* lines. *Dilp2-GAL4<sup>R</sup>* and *Dilp2-GAL4<sup>37516</sup>* consist of three copies of a 859-bp *Dilp2* upstream fragment regulating the GAL4 transcriptional activator, whereas *Dilp2-LexA* is controlled by a single copy of the upstream fragment. (I) qPCR analysis detects *Dilp2* transcript levels in *Dahomey w* trachea that account for ~10% of total *Dilp2* transcript. For qPCR, 50 trachea were dissected from wandering L3 for each biological replicate and *Dilp2* expression measured. Normalized  $\Delta$ Ct values were compared. Trachea were taken as *Dilp2* positive if expression was significantly higher than that observed in  $\Delta$ *Dilp2* deletion mutants, then compared with total *Dilp2* expression from wandering, whole *Dahomey* larvae ( $***P < 0.001$ , ANOVA,  $n = 5$ ). The dotted line represents total *Dilp2* expression in whole larvae.

*Dilp2-GAL4<sup>37516</sup>*, both drove expression strongly in the nuclei of L3 trachea (Fig. 4B-C'). These *Dilp2-GAL4* lines were generated by cloning three copies of an 859 bp fragment upstream of the *Dilp2* gene locus in front of GAL4, a construct that was subsequently randomly integrated into the *Drosophila* genome (Rulifson et al., 2002) (see schematic in Fig. 4H). We observed that tracheal expression is not due to the genomic insertion site of this fragment in these lines, but rather is intrinsic to the transgene itself, as re-isolating and cloning a single copy of the upstream fragment into a different binary expression system, the *LexA/LexAop* system, also results in tracheal activity of the *Dilp2-LexA* (Fig. 4D-D'). Combining *Dilp2-GAL4<sup>R</sup>* with a *breathless-GAL80* (*btl-GAL80*) – a tracheal blocker of GAL4 activity (Metzstein and Krasnow, 2006) – abolished tracheal activity of the *Dilp2-GAL4<sup>R</sup>*, but retained IPC activity (Fig. 4E,E'). Furthermore, two other *Dilp2-GAL4* lines, *Dilp2-GAL4<sup>215-1-1-1</sup>* (Park et al., 2014) and *Dilp2-GAL4<sup>96A08</sup>* (Pfeiffer et al., 2008), cloned from other, single upstream *Dilp2* fragments, did not exhibit tracheal activity above low, autofluorescent background (Fig. 4F-G'). Our observation that the *Dilp2-GAL4<sup>R</sup>* line drives expression in IPCs and trachea raised two questions: (1) does the enhancer activity reflect bona fide expression of *Dilp2* in the trachea, and (2) what is the relative role of IPCs and trachea in the observed growth phenotype in *Dilp2-GAL4<sup>R</sup>>EcR<sup>DN</sup>* animals? To address the first question, we determined *Dilp2* transcript levels in trachea. *Dilp2* transcript was detected in the trachea of *Dahomey w<sup>-</sup>* animals, accounting for ~10% of total body *Dilp2* expression (Fig. 4I). We directly tested whether tracheal *Dilp2* contributes significantly to systemic growth. Knockdown of tracheal *Dilp2* using the trachea-specific *btl-GAL4* and two different RNAi lines

or overexpression of *Dilp2* in the trachea did not have effects on growth (Fig. S4). To ascertain the absence of any activity outside the trachea we used G-TRACE to confirm specificity of *btl-GAL4* (Fig. S5). Taken together, *Dilp2-GAL4<sup>R</sup>* and *Dilp2-GAL4<sup>37516</sup>*, the most commonly used GAL4 lines to transgenically manipulate IPCs, exhibit strong activity in the trachea that may reflect endogenous *Dilp2* expression, though this *Dilp2* expression seems to be dispensable for systemic growth.

To address the second question, we first tested whether perturbing 20E signalling in the trachea can phenocopy growth defects using a tracheal *btl-GAL4* (Fig. S6). At 25°C, this condition was lethal, and at 18°C adult flies emerged that exhibited significant growth defects (Fig. S6).

Next, we repeated experiments with *Dilp2-GAL4<sup>R</sup>*; *btl-GAL80* and *Dilp2-GAL4<sup>215-1-1-1</sup>*, neither of which exhibits tracheal GAL4 activity (Fig. 4E',F'). Remarkably, repeating growth experiments and qPCR measurement of *Dilp2*, *Dilp3* and *Dilp5* revealed a substantial reduction in the severity of growth defects, and the absence of *Dilp3* and *Dilp5* expression reduction (Fig. 5A-H). Flies still exhibited small growth reductions with *Dilp2-GAL4<sup>R</sup>*; *btl-GAL80* (Fig. 5A), but overexpressing *EcR<sup>B1[DN]</sup>* in the IPCs with *Dilp2-GAL4<sup>215-1-1-1</sup>* resulted in no observable size phenotypes (Fig. 5E). These differences in size phenotypes likely reflect differences in GAL4 strength, given that *Dilp2-GAL4<sup>R</sup>*; *btl-GAL80* has three copies of the enhancer sequences driving GAL4, whereas only one copy is present in *Dilp2-GAL4<sup>215-1-1-1</sup>*. We confirmed these differences in GAL4 strength by direct measurement of *GAL4* mRNA with qRT-PCR. *Dilp2-GAL4<sup>R</sup>*; *btl-GAL80* has threefold higher *GAL4* transcript levels than *Dilp2-GAL4<sup>215-1-1-1</sup>* (Fig. S7).

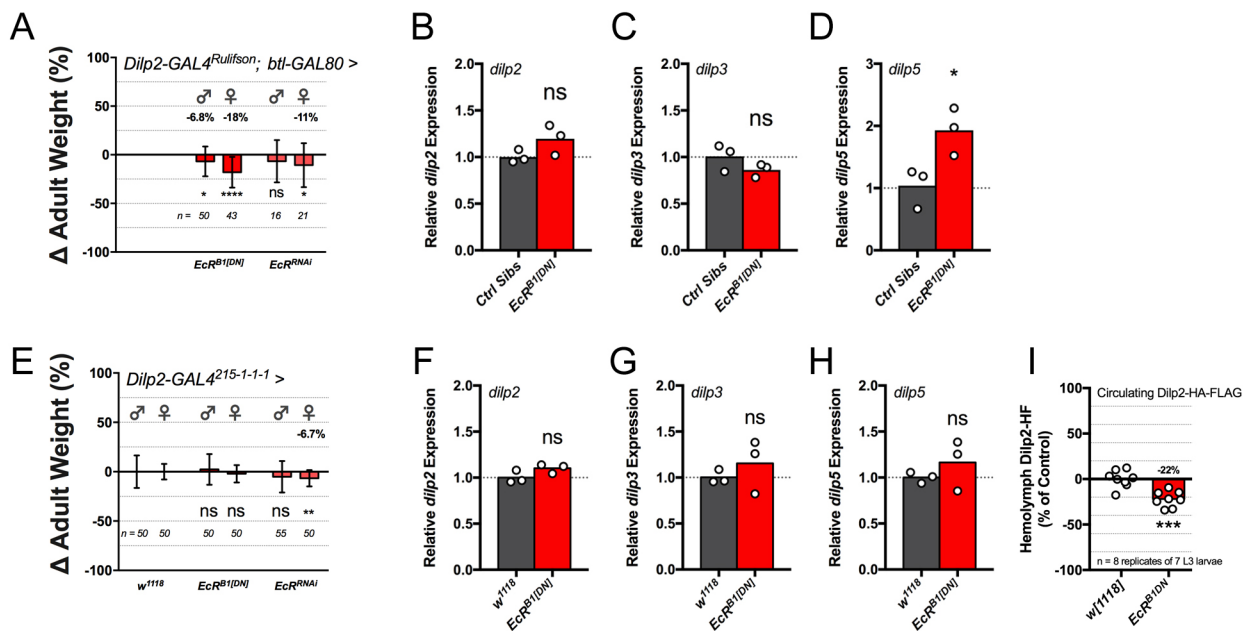

**Fig. 5. 20E is required in both the trachea and the IPCs.** (A) Overexpression of *EcR<sup>B1[DN]</sup>* or genetic depletion of EcR using *btl-GAL80* (A) or *Dilp2-GAL4<sup>215-1-1-1</sup>* (E) does not or only partially recapitulate the growth defects observed with *Dilp2-GAL4<sup>R</sup>* alone. Knockdown of EcR results in significantly smaller females with both drivers, whereas overexpression of *EcR<sup>B1[DN]</sup>* results in smaller males and females only with *Dilp2-GAL4<sup>R</sup>*; *btl-GAL80* (\* $P < 0.05$ , \*\* $P < 0.01$ , \*\*\*\* $P < 0.0001$ , one-tailed, unpaired *t*-test; mean difference in weight  $\pm$  s.d.; A:  $n = 50$  male 43 female *EcR<sup>B1[DN]</sup>*,  $n = 16$  male 21 female *EcR-RNAi*; E:  $n = 50$  GFP,  $n = 50$  *EcR<sup>B1[DN]</sup>*,  $n = 55$  male 50 female *EcR-RNAi*). *Dilp2-GAL4<sup>215-1-1-1</sup>>DN* or *RNAi* flies were compared with *Dilp2-GAL4<sup>215-1-1-1</sup>>+* crossed into an identical genetic background (*w<sup>1118</sup>*) and placed at identical densities on fly food to control for crowding. (B-D,F-H) Loss of *Dilp3* and *Dilp5* transcript levels result mainly from *Dilp2-GAL4<sup>R</sup>*-driven perturbation of EcR in the trachea, and not the IPCs. Perturbing 20E signalling specifically in the IPCs using *Dilp2-GAL4<sup>215-1-1-1</sup>* did not result in any *Dilp* gene transcriptional changes ( $P > 0.05$ , ANOVA). RNA was collected from replicates of seven larvae. For *Dilp2-GAL4<sup>215-1-1-1</sup>*, *Dilp* gene expression was compared with *Dilp2-GAL4<sup>215-1-1-1</sup>>+* larvae in the same genetic background as the *UAS-EcR<sup>B1[DN]</sup>* and *UAS-RNAi* lines (*w<sup>1118</sup>*). Transcript levels were normalized using the geometric mean of *RpS13* and *Rp49* expression. (I) Overexpression of *EcR<sup>B1[DN]</sup>* specifically in IPCs using *Dilp2-GAL4<sup>215-1-1-1</sup>* resulted in a 20% reduction in secreted Dilp2 (\*\* $P < 0.001$ , ANOVA;  $n = 8$ ). ns, not significant.

In the latter animals, we measured circulating Dilp2 and demonstrated a 20% reduction in secreted Dilp2 protein, suggesting that 20E may function in the IPCs to regulate IIS, possibly less so at the level of Dilp gene transcription (although we do see increased *Dilp5* expression with *Dilp2-GAL4<sup>R</sup>*; *btl-GAL80 >EcR-DN*), but rather by regulating Dilp2 secretion (Fig. 5B-D,F-I). We also analysed expression and functional requirements of the EcR co-receptor Ultraspiracle (Usp) in the IPCs and found that Usp is expressed in the IPCs and that targeted knockdown results in growth phenotypes similar to those observed when disrupting EcR in IPCs (see Fig. S8). In summary, we conclude that the impact of 20E on growth is mediated via trachea and IPCs.

Taken together, these data show that production of bioactive 20E is nutrient dependent, and that Ecdysone Receptor and its co-receptor Ultraspiracle are required in both the trachea and IPCs. Perturbation of 20E signalling in the trachea results in a starvation-like phenotype, inhibiting insulin output from the IPCs and resulting in severe growth and metabolic storage defects. On the other hand, 20E signalling in the IPCs also directly regulates IIS, albeit less prominently than when 20E is also perturbed in the trachea. Our data provide a potentially novel mechanism by which nutrients regulate the production of steroids that act on different tissues, i.e. trachea and IPCs, to control growth and maturation in a complex, intercommunicating network (Fig. 6). Finally, we identify the trachea as a tissue with an important regulatory role in growth and maturation. This fact will have to be considered in other studies given the widespread use of the *Dilp2-GAL4<sup>R</sup>* driver line when studying growth and maturation and its regulation.

## DISCUSSION

Integration of growth and developmental timing is an essential requirement for the orderly progression of development. In insects, insulin and ecdysone signalling regulate the rate and timing of growth in response to nutrition, but the mechanisms by which this occurs and how they are coordinated are incompletely understood. Here, we show that production of 20E by the enzyme Shade in the FB is nutrient dependent and that *shade* is required for growth, and we provide two new avenues by which 20E can regulate IIS-dependent growth – via the trachea and the IPCs. Therefore, our data support the existence of an essential mechanism in the coordination of growth control with developmental progression and yield important insights into how nutrition impinges on physiology and development.

To coordinate the onset of developmental transitions with nutritional status, *Drosophila* employs a number of non-autonomous signals that relay nutritional information in feeding larvae from the FB, the primary nutrient sensor, to the IPCs that regulate IIS (Pasco and Léopold, 2012; Rajan and Perrimon, 2012; Sano et al., 2015; Agrawal et al., 2016; Delanoue et al., 2016; Koyama and Mirth, 2016). This nutrient-dependent IIS regulation serves to control both growth and developmental timing, as IPC-released Dilps also promote ecdysone biosynthesis in the PG. Ecdysone biosynthesis can also be nutritionally regulated via TOR signalling in the PG, which, similar to IIS, promotes expression of the enzymes required for synthesis of ecdysone starting from cholesterol. A recent study has shown that this is controlled in part by a TOR-mediated cell cycle checkpoint, with TOR being required for endoreplication of PG cells and production of appropriate levels of ecdysone, which is then converted in the FB to 20E. In starved animals, levels of ecdysone biosynthetic enzymes in the PG and 20E levels are significantly reduced. These animals fail to undergo maturation onset. This can be rescued with supplementation of ingestible 20E (Ohhara et al., 2017). In our work, we show that expression of *shade*, the final enzyme in 20E biosynthesis that is expressed in the FB, is also reduced upon starvation or knockdown of the amino acid transporter *slimfast*, and that it can be rescued by supplementation of 20E and, albeit less efficiently, ecdysone. The ability of ecdysone to rescue maturation is consistent with earlier work describing precocious pupariation induced by ecdysone (Ono, 2014). Although not well understood, further evidence for a hormonal role of ecdysone in regulating developmental transitions as well as for separate effects of 20E and ecdysone have been described in Lepidoptera and *Drosophila* (Tanaka, 1995; Tanaka and Takeda, 1993; Champlin and Truman, 1998; Baker et al., 2003; Beckstead et al., 2007). The effect of ecdysone in *Drosophila* was counteracted by juvenile hormone (JH) addition (Ono, 2014). Even though it remains to be formally proven, this counteracting effect of JH could possibly explain our observation that addition of ecdysone and 20E in starved animals induced maturation earlier than in their fed counterparts. Evidence in mosquitoes and the German cockroach *Blattella germanica* indicates that JH levels are nutrition dependent with starvation resulting in low JH (Noriega, 2014; Sören-Castillo et al., 2012). This in turn would decrease the counteracting effect of ecdysone and thus lead to earlier maturation in starved versus fed animals. Overall, we propose that the endoreplication in the prothoracic gland is a

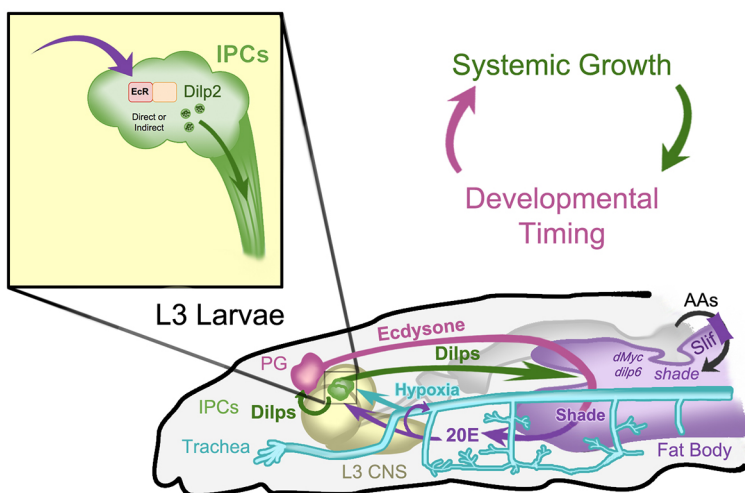

**Fig. 6. Convergence of humoral signals in central and peripheral tissues maintain an endocrine 'goldilocks zone' to coordinate developmental progression and systemic growth.** Ecdysone and insulin signalling operate in a double-feedback loop to facilitate normal growth and development that integrates numerous tissues. Ecdysone is produced by the PG and is converted in the FB to 20E by Shade, the expression of which is regulated by nutritional information. 20E contributes to IIS regulation via peripheral tissues, including the FB and trachea, and also via central regulation in the IPCs. IIS can in turn promote ecdysone biosynthesis in the PG. Together, 20E and IIS can converge in peripheral tissues or work independently to propagate messages of systemic growth (IIS) and developmental progression (20E) and maintain an endocrine 'goldilocks zone' between these two physiological processes.



mechanism to increase bulk ecdysone production, and that the nutrient-sensitive conversion to 20E in the FB is a regulatory level that allows rapid adjustment of available bioactive steroid levels to environmental conditions.

The demonstration of nutrition-dependent ecdysone activation draws an intriguing parallel with steroid biosynthesis in mammals. The cholesterol-derived mammalian steroid oestradiol is required in both sexes for  $\beta$ -cell development and function in the pancreas. Oestradiol can be converted from testosterone by the CYP450 CYP19 (also known as aromatase), which exhibits expression in a wide range of tissues, including the liver and adipose tissues, comparable to the insect FB (Cui et al., 2013). Interestingly, evidence in the literature points to CYP19 also being nutritionally regulated. CYP19-mediated conversion of testosterone to oestradiol is reduced in starved rodents (Seidl and Pirke, 1987), and obese patients have both increased oestradiol and measured testosterone-to-oestradiol conversion (Kley et al., 1980; Polari et al., 2015). This suggests that a similar nutrition-mediated steroid activation may function in regulating insulin output of mammals and warrants further investigation, particularly in the context of several human disorders with nutrition-associated phenotypes (e.g. obesity and anorexia nervosa) that also impact timing of sexual maturity (Kaplowitz, 2008; Stipp, 2011; Wagner et al., 2012; Li et al., 2017).

20E plays a diverse and complex role in growth regulation that differs depending on tissue, time and hormone titre. For example, in the FB, 20E can both inhibit and promote systemic growth via negative regulation of *Myc* and positive regulation of *Dilp6* (Delanoue et al., 2010). *Dilp6* released from the FB inhibits *Dilp2* and *Dilp5* secretion during feeding, but promotes growth during non-feeding stages (Bai et al., 2012; Slaidina et al., 2009). Another example is in the imaginal discs, where 20E promotes tissue-autonomous growth, whereas higher titres during maturation facilitate differentiation of the discs into their prospective adult tissues (Herboso et al., 2015; Yamanaka et al., 2013). The apparent role of 20E in growth regulation distinct from its traditional role in promoting developmental transitions provides a further layer of complexity. In previous work, it was shown that transgenic manipulations during L3 of 20E titres by IIS inhibition in the PG altered systemic growth without affecting developmental timing (Colombani et al., 2003). In our work, we show that knockdown of the 20E biosynthesis enzyme *shade* in the FB reduced growth and delayed maturation onset. FB *shade* has been previously implicated in developmental timing, though a role in growth has not been described and, together with our other results, suggests this regulation is a nutrient-dependent process (Akagi et al., 2016). Interestingly, with knockdown of *shade* in the larval FB, we observed retention of *Dilp2* and *Dilp3*, whereas *Dilp5* was unaffected. This contrasts with most previously identified regulators of *Dilp* secretion, which appear to control *Dilp2* and *Dilp5* simultaneously. However, given recent work demonstrating that *Dilp2* and *Dilp5* have distinct functions, and several examples of their independent regulation at the transcriptional level (Birse et al., 2011; Varghese et al., 2010; Yu et al., 2012; Post et al., 2018), it is not inconceivable that, at the level of regulated secretion, *Dilp2* and *Dilp5* can be regulated either separately or in a concerted way. We also performed reciprocal experiments to examine whether overexpressing *shade* in the FB during nutrient deprivation affected body size and *Dilp* levels. During starvation, overexpressing *shade* rescued nutrient-dependent reductions of *Dilp3*. We also observed a weight gain in these animals, an observation we were able to attribute to water retention (see Fig. S2). This draws a further interesting parallel with mammals, in which exogenous steroid application similarly results in increased water retention (McKay and

Cidlowski, 2003). Given the previously identified connections between the FB and IPC-regulated growth, we wondered whether insulin output from the IPCs was affected in *shade* knockdown animals. Knockdown of *shade* resulted in reduced *Dilp3* expression and retention of *Dilp2* and potentially also *Dilp3*. This led us to investigate a possible direct regulatory role of 20E in the IPCs.

Our initial experimentation identified phenotypes of extreme growth and IIS reduction when 20E was perturbed in the IPCs using *Dilp2-GAL4<sup>R</sup>*, the most commonly used *Dilp2-GAL4* driver. We then mapped in detail the spatiotemporal expression pattern generated by this GAL4 driver and found expression in the trachea in addition to the well-known expression in the IPCs. A significant part of the observed phenotypes was next shown to depend on ecdysone signalling in the trachea. Given that the *Dilp2-GAL4<sup>R</sup>* driver has been used in numerous studies (>70) on the regulation of growth and maturation, it will be important to carefully revisit whether the published observations are not due to tracheal activity of the driver and, consequently, genetic manipulations perturbing tracheal development and function. Revisiting some of these studies with the *Dilp2-GAL4<sup>R</sup>*; *btl-GAL80* or a second *Dilp2-GAL4* driver may also help to resolve some of the contradictions that exist between published observations. A notable example of this is differences in phenotypic severity between the various IPC ablation studies, which show a range of size reductions from more than 50% to half that depending on the *Dilp2-GAL4* lines that were used (Ikeya et al., 2002; Rulifson et al., 2002). In summary, these observations emphasize the necessity for performing tissue-specific manipulation experiments with multiple drivers and raise concerns over reproducibility with respect to conclusions drawn from experiments made with single GAL4 drivers.

Our combined results identify the trachea and the IPCs as two targets of 20E action to regulate insulin signalling in the third larval instar. The trachea and oxygen supply had previously been shown in the tobacco hornworm *Manduca sexta* and in *Drosophila* to be important determinants of growth and metamorphosis (Callier and Nijhout, 2011; Callier et al., 2013; Helm and Davidowitz, 2013). The IIS phenotypes we observe when perturbing 20E signalling using *Dilp2-GAL4<sup>R</sup>* during L3 (Fig. 3D-G) were reminiscent of those previously reported for hypoxic animals, i.e. reduced *Dilp3* and *Dilp5* transcription and a retention of *Dilp2* (Wong et al., 2014). The fact that the strongest growth and metabolic phenotypes disappeared upon blocking tracheal *Dilp2-GAL4* activity shows that 20E acts on the L3 trachea to regulate insulin signalling. Future work will allow us to determine the mechanistic basis of trachea-dependent regulation of insulin signalling by the steroid hormone 20E. Given that we did not find evidence for a significant impact of tracheal *Dilp2* on growth, it seems more likely that the effect of 20E on insulin signalling involves a primary role of 20E in normal tracheal differentiation, morphology and/or function with secondary hypoxia regulating insulin signalling. As 20E has been implicated in tracheal morphogenesis and differentiation during embryonic development in *Drosophila* (Chavoshi et al., 2010) in an organ-autonomous manner, we propose that the same may be true at other developmental stages and during maturation. Nevertheless, our finding that *Dilp2* is expressed in the trachea highlights an understudied aspect of growth regulation, namely whether *Dilp2*, *Dilp3* and *Dilp5*, the ILPs produced by the IPCs, are also produced in and released by other tissues. Functional redundancy and compensatory regulation among the *Dilp* genes have obfuscated identification of these thus far, though future studies using more defined and efficient tissue- and gene-specific manipulations could better elaborate on their contribution to growth.

In addition to the regulation of insulin signalling by 20E via the trachea, we also provide evidence that 20E acts directly in the IPC where EcR may act to change IPC output.

To conclude, we find that 20E bioactivation by *shade* is a nutrient-dependent process important in regulating both growth and developmental timing that appears to depend on direct regulation in trachea and IPCs. Our work provides important insights into how nutritional status is coordinated with maturation, via a complex integration of insulin and steroid signals.

## MATERIALS AND METHODS

### Fly stocks and transgenes used in this study

*Drosophila* stocks were reared at 25°C using standard yeast fly food recipe and rearing conditions. Stocks were ordered from the Bloomington *Drosophila* Stock Center (BDSC) or Vienna *Drosophila* RNAi Center (VDRIC). The following stocks were used: *Dilp2-GAL4<sup>R</sup>* (provided by Dr E. Rulifson; BDSC# 37516, described in Rulifson et al., 2002), *Dilp2-GAL4<sup>215-1-1-1</sup>* (Park et al., 2014), *Dilp2-GAL4<sup>96A08</sup>* (Pfeiffer et al., 2008), *Dilp2-HA-FLAG* (provided by Dr R. Delanoue; Park et al., 2014; Pfeiffer et al., 2008). To visualize IPCs, *Dilp2-GAL4* lines controlled expression of *UAS-sytGFP* (Zhang et al., 2002). Similarly, to perturb 20E signalling, *Dilp2-GAL4* lines controlled *UAS-RNAi* or *UAS-EcR<sup>B1[DN]</sup>* (Brown et al., 2006). *UAS-shade* was a gift of Dr M. O'Connor (Petryk et al., 2003). *Dahomey w<sup>-</sup>* flies, a gift of Dr C. Ribeiro (Champalimaud Centre for the Unknown, Lisbon, Portugal), were used as a wild-type stock for positive controls in starvation experiments. RNAi lines used in this study include *EcR-RNAi* (BDSC# 50712), *shade-RNAi* (VSC#: v17203, v106072) and *Usp-RNAi* (generated by Dr C. Antonewski and provided by Dr A. Andres and Dr K. Lantz, University of Nevada, Las Vegas, USA).

### Larval starvation, hormone supplementation and *shade* rescue experiments

For starved/fed experiments, L3 larvae were staged and collected from yeasted 1% agar plates, then collected at 72 h AEL and transferred to either new, yeasted sucrose plates (fed) or 1% non-nutritive agar plates (starved). To control for crowding, embryos were divided with an equal density (50 embryos/agar plate). FBs were carefully dissected in clean 1× PBS and snap-frozen before addition of QIAzol Lysis Reagent (Qiagen, 79306) and RNA extraction, cDNA synthesis and qPCR as described below.

For hormone supplementation experiments, larvae were collected at 72 h AEL and starved on filter paper supplied with either 1 mg/ml 20E or 1 mg/ml ecdysone in 6% ethanol; negative control was 6% ethanol alone. During feeding, 20E or ecdysone was supplemented into 50 µl of a 40% yeast paste solution.

For *shade* rescue experiments, *ppl-GAL4>GFP* and *ppl-GAL4>shade* L3 larvae were synchronously staged and reared at identical densities until L3 ecdysis before being subjected to 24 h starvation or feeding on yeasted sucrose agar plates as described above. Whole L3 larvae were then collected and RNA extraction, cDNA synthesis and qPCR were performed as described below.

### Developmental staging and time to pupariation

Staging of *Drosophila* larvae was performed by collecting embryos at 2- to 3-h intervals on yeasted, 20% sucrose 1% agar plates and visually scoring progression through instar stages at 25°C on a 12 h light/dark cycle. Time to pupation was scored, where replicates of five to ten larvae were isolated just after L3 ecdysis and reared in normal conditions described above. The number of pupae were counted every 6 h. The time to pupation of surviving larvae was plotted in GraphPad Prism software and compared with control siblings reared in identical nutritive conditions. The time to 100% pupation was compared between genotypes to assess statistically significant differences in developmental timing.

### Determination of adult fly weight and larval growth rates

After 3-7 days, experimental (*Dilp2-GAL4>UAS-EcR<sup>B1[DN]</sup>* or *UAS-RNAi*, *UAS-sytGFP*) and control siblings (*CyO*; *UAS-EcR<sup>B1[DN]</sup>* or *UAS-RNAi*,

*UAS-sytGFP*) reared in identical environmental conditions were anesthetized using chloroform and weighed on a Mettler Toledo XS204 scale (d=0.1 mg). For the determination of larval growth rates, larvae were isolated after second instar (48 h AEL) and weighed every 6 h, starting in late L2, prior to third instar ecdysis (~72 h AEL). Mean weight between experimental and control siblings was compared using a Student's *t*-test with GraphPad software, and the change in adult weight between experimental and control genotypes were plotted. Larval weights were plotted as a function of time and a linear regression calculated to determine growth rates. The interaction terms of the regression lines for larval growth rates were then compared using GraphPad Prism software. Images of adult flies and larvae were taken using Olympus CellD software and figures were arranged in Adobe Photoshop CS4. For growth rate and weight experiments without internal control siblings (i.e. *ppl-GAL4*), animals were reared at controlled densities of ~50 larvae per plate.

For starvation weight experiments, larvae were weighed before and after 24 h starvation, and the change in weight was plotted as a percentage value. These experiments were also repeated weighing three larvae at a time to ensure accurate measurement and reproducibility.

### qPCR analysis

Total RNA was isolated using TRI reagent (Invitrogen) and reverse transcription was performed on 1 µg RNA using Transcriptor First Strand Synthesis kit (Roche). Total RNA from fat bodies was isolated using QIAzol lysis reagent optimized for fatty tissues (Qiagen, 79306). Primer sequences used are listed in Table S1. qPCR was performed on a Step-One-Plus using the SYBR Green detection system. Transcript levels were normalized using the geometric means of *RpS13* and *Rp49*, or *RpL3* and *Rp49*. Mean  $\Delta$ Ct values were statistically compared as described below. Relative quantitation of transcript levels to control genotypes were calculated using the  $\Delta\Delta$ Ct method and plotted with GraphPad Prism software to visualize expression differences.

### Immunohistochemistry and Nile Red staining

Adult and larval brains were dissected in 1× PBS prior to 30 min fixation with 4% formaldehyde. For imaging of FBs, synchronously timed larvae were inverted and fixed for 30 min in 4% formaldehyde prior to antibody or Nile Red staining.

Primary antibodies were incubated overnight at 4°C in PAXD (PBS containing 1% BSA, 0.3% Triton X-100, 0.3% deoxycholate). Antibodies used in this study were mouse anti-GFP [Developmental Studies Hybridoma Bank (DSHB), 8H11; 1:100], rabbit anti-GFP (Life Technologies, A6455; 1:1000), mouse anti-EcR (common; 1:20) and mouse anti-EcR-B1 (1:20; Ag10.2 and AD4.4, respectively, deposited to the DSHB by Carl Thummel and David Hogness), rabbit anti-Dilp2 (1:1000; Rulifson et al., 2002), rabbit anti-dFoxO (1:200, provided by Dr P. Leopold, Institut Curie, Paris, France), mouse anti-Usp (1:20; provided by Dr C. Thummel, University of Utah, Salt Lake City, USA).

Rabbit antibodies directed against the Dilp3 partial peptide sequence DEVLRYCAAKPRT and against the Dilp5 peptide sequence RRDFRGVVDSCCRKS were generated as a service by Thermo Fisher Scientific. For immunostaining, anti-Dilp3 antibodies were used at a dilution of 1:500 and anti-Dilp5 antibodies used at a dilution of 1:200. Anti-Dilp3 and anti-Dilp5 antibodies were validated using Dilp3 and Dilp5 amorph mutant lines (Grönke et al., 2010) (See Fig. S9). Secondary antibodies used include FITC- and Cy3-conjugated goat anti-mouse and goat anti-rabbit (1:200; Jackson ImmunoResearch, 115-095-003, 111-095-003, 115-165-003, 111-165-003). All secondary antibodies were used at a dilution of 1:200.

FB lipid droplets were stained with Nile Red (working concentration of 1:10,000) on inverted L3 larvae collected in 1× PBS and fixed for 20 min in 4% formaldehyde in PBT (PBS containing 0.1% Triton X-100). Fat bodies were then removed and mounted in Vectashield Mounting Medium (Vector Laboratories, H-1000).

Immunohistochemistry images were taken with an Olympus FluoView FV1000 confocal microscope and processed using ImageJ64 (1.6.0\_65; FIJI) (Schindelin et al., 2012; Schneider et al., 2012) and Photoshop CS4 software.

### Analysis of larval feeding

For imaging food consumption, larvae were reared to L3 and transferred at 72 h AEL to a yeast 1% sucrose agar plate, where both agar and yeast were supplemented with a red food colouring dye. Larvae were then imaged 3 h after feeding and the presence of food dye in the digestive tract was used as a measure for feeding.

### Triglyceride determination

Larvae were collected at ~96 h AEL, snap-frozen and homogenized in 220  $\mu$ l 0.05% Tween-20 in 1 $\times$  PBS. Samples were heated to 70°C for 10 min to inactivate lipase enzyme, centrifuged at 13,000 g and 25  $\mu$ l of the supernatant, 0.05% Tween-20 blank or a known concentration of Sigma Glycerol Standard (G7793) was added to 200  $\mu$ l of Infinity Triglyceride Reagent from Thermo Fisher Scientific (981786) or Sigma Free Glycerol Reagent (F-6428) and incubated for 60 min at 37°C. Absorbance was measured at 540 nm on a TECAN M200 Pro spectrophotometer. Triglyceride measurements were normalized by total protein content, measured using the Pierce BCA protein assay kit at 562 nm, and visualized relative to control siblings reared in identical environmental conditions.

### Measurement of circulating Dilp2-HA-FLAG

Measurement of haemolymph Dilp2 protein was performed as described by Park et al. (2014). Replicates of seven larvae were gently bled on a depressed slide and 1  $\mu$ l of haemolymph was collected. Samples were adhered to 96-well plates coated with anti-FLAG antibody (Sigma, F1804-50UG) and anti-HA-Peroxidase (3F10; Roche, 12 013 819 001) was added. Detection was performed using 1-step TMB Ultra ELISA substrate for 30 min at room temperature before absorbance values were measured at 450 nm. Mean circulating Dilp2-HA-FLAG was compared between samples and circulating Dilp2-HA-FLAG (Dilp2-HF) was plotted relative to *Dilp2-GAL4<sup>215-1-1-1/+</sup>* controls in an identical *w<sup>1118</sup>* genetic background (*w<sup>1118</sup>*) to *EcR<sup>B1[DN]</sup>* or RNAi constructs. The standard used for determination was the synthetic peptide FLAG(GS)HA (DYKDDDDKGGGSSYPYDVPDYA) synthesized by LifeTein LLC.

### Statistics

Statistics were conducted using GraphPad Prism software. All statistics were performed on raw data after normalization, where applicable (i.e. qPCR). For assays comparing means, one-tailed, unpaired *t*-tests for pairwise comparisons (as in between *ppl-GAL4>GFP* and *ppl-GAL4>shade-RNAi* larvae) or one-way analysis of variance (ANOVA) tests for multiple comparisons were used. To test whether variance differed significantly between samples, an *F*-test was performed for pairwise comparisons and both Brown–Forsythe and Bartlett’s Tests performed for multiple comparisons. If the standard deviations between samples were significantly different, a *t*-test with Welch’s correction (Welch’s *t*-test) was performed for multiple comparisons, whereas the Geisser–Greenhouse correction was always applied on all one-way ANOVA analyses, as sphericity of the data was not assumed. When comparing means with a single control sample (as with *Dilp2-GAL4<sup>215-1-1-1/+</sup>* and *Dilp2-GAL4<sup>215-1-1-1</sup>* > RNAis), Dunnett’s multiple comparisons test was used, and when comparing each mean to each other, Tukey’s multiple comparisons test was used.

For the comparison of growth rates, a linear regression was fitted to raw weights distributed over defined time points. The slope of the curve defined the growth rate (gain in mass, *x*, over time, *y*). The *R*<sup>2</sup> of the slope (goodness of fit) was calculated, and to test whether slopes are significantly different, an equivalent test to the analysis of covariance (ANCOVA) was performed to derive an *F* statistic and *P*-value (Zar, 1984).

For all statistical analyses, we assumed a significance level of 0.05. For visualization of relative data, raw data were normalized to control samples either as a function of decimal (control=1.0; i.e. qPCR analysis), percentage [control=100%; i.e. triacylglycerols (TAG) measurement] or change over time ( $\Delta$ ; control=0.0%; i.e. weight and circulating Dilp2-HA-FLAG measurement).

### Acknowledgements

We thank Dr Carl Thummel for providing the anti-Usp antibodies and Dr Pierre Léopold for the anti-dFOXO antibodies; Dr Andrew Andres and

Kathryn Lantz for providing the *Usp-RNAi*, generated by Christopher Antonewski; Dr Michael O’Connor for providing the *UAS-shade* line; Dr Mark Metzstein for providing the *btl-GAL80* line; and Robert Harkness for critical feedback on this manuscript.

### Competing interests

The authors declare no competing or financial interests.

### Author contributions

Conceptualization: K.B., J.C., P.C.; Methodology: K.B., M.W., L.B., V.V.; Validation: K.B.; Formal analysis: K.B., J.C., M.W., L.B., V.V., P.C.; Investigation: K.B., J.C., V.V.; Resources: K.B.; Data curation: K.B., M.W., L.B., V.V.; Writing - original draft: K.B., P.C.; Writing - review & editing: K.B., J.C., M.W., L.B., V.V., P.C.; Visualization: K.B., J.C., M.W.; Supervision: P.C.; Project administration: P.C.; Funding acquisition: P.C.

### Funding

K.B. is a predoctoral (‘aspirant’) fellow of the Fonds Wetenschappelijk Onderzoek (FWO). This work was supported by Vlaams Instituut voor Biotechnologie (VIB) funding (P.C.) and FWO grants (G065408.N10 and G078914N to P.C.).

### Supplementary information

Supplementary information available online at <http://dev.biologists.org/lookup/doi/10.1242/dev.165654.supplemental>

### References

- Agrawal, N., Delanoue, R., Mauri, A., Basco, D., Pasco, M., Thorens, B. and Léopold, P. (2016). The *Drosophila* TNF eiger is an adipokine that acts on insulin-producing cells to mediate nutrient response. *Cell Metab.* **23**, 675–684.
- Akagi, K., Sarhan, M., Sultan, A.-R. S., Nishida, H., Koie, A., Nakayama, T. and Ueda, H. (2016). A biological timer in the fat body comprising Blimp-1, BFTz-f1 and Shade regulates pupation timing in *Drosophila melanogaster*. *Development* **143**, 2410–2416.
- Bai, H., Kang, P. and Tatar, M. (2012). *Drosophila* insulin-like peptide-6 (*dilp6*) expression from fat body extends lifespan and represses secretion of *Drosophila* insulin-like peptide-2 from the brain. *Aging Cell* **11**, 978–985.
- Baker, K. D., Shewchuck, L. M., Kozlova, T., Makishima, M., Hassell, A., Wisely, B., Caravella, J. A., Lambert, M. H., Reinking, J. L., Krause, H. et al. (2003). The *Drosophila* orphan nuclear receptor DHR38 mediates an atypical ecdysteroid signaling pathway. *Cell* **113**, 731–742.
- Beckstead, R. B., Lam, G. and Thummel, C. S. (2007). Specific transcriptional responses to juvenile hormone and ecdysone in *Drosophila*. *Insect Biochem. Mol. Biol.* **37**, 570–578.
- Birse, R. T., Söderberg, J. A. E., Luo, J., Winther, A. M. and Nässel, D. R. (2011). Regulation of insulin-producing cells in the adult *Drosophila* brain via the tachykinin peptide receptor DTKR. *J. Exp. Biol.* **214**, 4201–4208.
- Brogio, W., Stocker, H., Ikeya, T., Rintelen, F., Fernandez, R. and Hafen, E. (2001). An evolutionarily conserved function of the *Drosophila* insulin receptor and insulin-like peptides in growth control. *Curr. Biol.* **11**, 213–221.
- Brown, H. L. D., Cherbas, L., Cherbas, P. and Truman, J. W. (2006). Use of time-lapse imaging and dominant negative receptors to dissect the steroid receptor control of neuronal remodeling in *Drosophila*. *Development* **133**, 275–285.
- Callier, V. and Nijhout, H. F. (2011). Control of body size by oxygen supply reveals size-dependent and size-independent mechanisms of molting and metamorphosis. *Proc. Natl. Acad. Sci. USA* **108**, 14664–14669.
- Callier, V., Shingleton, A. W., Brent, C. S., Ghosh, S. M., Kim, J. and Harrison, J. F. (2013). The role of reduced oxygen in the developmental physiology of growth and metamorphosis initiation in *Drosophila melanogaster*. *J. Exp. Biol.* **216**, 4334–4340.
- Champlin, D. T. and Truman, J. W. (1998). Ecdysteroid control of cell proliferation during optic lobe neurogenesis in the moth *Manduca sexta*. *Development* **125**, 269–277.
- Chavez, V. M., Marqués, G., Delbecque, J. P., Kobayashi, K., Hollingsworth, M., Burr, J., Natzle, J. E. and O’Connor, M. B. (2000). The *Drosophila* disembodied gene controls late embryonic morphogenesis and codes for a cytochrome P450 enzyme that regulates embryonic ecdysone levels. *Development* **127**, 4115–4126.
- Chavoshi, T. M., Moussian, B. and Uv, A. (2010). Tissue-autonomous EcR functions are required for concurrent organ morphogenesis in the *Drosophila* embryo. *Mech. Dev.* **127**, 308–319.
- Chen, C., Jack, J. and Garofalo, R. S. (1996). The *Drosophila* insulin receptor is required for normal growth. *Endocrinology* **137**, 846–856.
- Colombani, J., Raisin, S., Pantalacci, S., Radimerski, T., Montagne, J. and Léopold, P. (2003). A nutrient sensor mechanism controls *Drosophila* growth. *Cell* **114**, 739–749.
- Colombani, J., Bianchini, L., Layalle, S., Pondeville, E., Dauphin-Villemant, C., Antoniewski, C., Carré, C., Noselli, S. and Léopold, P. (2005). Antagonistic

- actions of ecdysone and insulins determine final size in *Drosophila*. *Science* **310**, 667-670.
- Cui, J., Shen, Y. and Li, R. (2013). Estrogen synthesis and signaling pathways during aging: from periphery to brain. *Trends Mol. Med.* **19**, 197-209.
- Danielsen, E. T., Moeller, M. E. and Rewitz, K. F. (2013). Nutrient signaling and developmental timing of maturation. *Curr. Top. Dev. Biol.* **105**, 37-67.
- Delanoue, R., Slaidina, M. and Léopold, P. (2010). The steroid hormone ecdysone controls systemic growth by repressing dMyc function in *Drosophila* fat cells. *Dev. Cell* **18**, 1012-1021.
- Delanoue, R., Meschi, E., Agrawal, N., Mauri, A., Tsatskis, Y., McNeill, H. and Léopold, P. (2016). *Drosophila* insulin release is triggered by adipose Stunted ligand to brain Methuselah receptor. *Science* **30**, 1553-1556.
- DiAngelo, J. R. and Birnbaum, M. J. (2009). Regulation of fat cell mass by insulin in *Drosophila melanogaster*. *Mol. Cell. Biol.* **29**, 6341-6352.
- Droujinine, I. A. and Perrimon, N. (2016). Intergon communication pathways in physiology: focus on *Drosophila*. *Annu. Rev. Genet.* **50**, 539-570.
- Evans, C. J., Olson, J. M., Ngo, K. T., Kim, E., Lee, N. E., Kuoy, E., Patananan, A. N., Sitz, D., Tran, P., Do, M.-T. et al. (2009). G-TRACE: rapid Gal4-based cell lineage analysis in *Drosophila*. *Nat. Methods* **6**, 603-605.
- Grönke, S., Clarke, D.-F., Broughton, S., Daniel Andrews, T. and Partridge, L. (2010). Molecular evolution and functional characterization of *Drosophila* insulin-like peptides. *PLoS Genet.* **6**, e1000857.
- Helm, B. R. and Davidowitz, G. (2013). Mass and volume growth of an insect tracheal system within a single instar. *J. Exp. Biol.* **216**, 4703-4711.
- Herboso, L., Oliveira, M. M., Talamillo, A., Pérez, C., González, M., Martín, D., Sutherland, J. D., Shingleton, A. W., Mirth, C. K. and Barrio, R. (2015). Ecdysone promotes growth of imaginal discs through the regulation of *Thor* in *D. melanogaster*. *Sci. Rep.* **5**, 12383.
- Ikeya, T., Galic, M., Belawat, P., Nairz, K. and Hafen, E. (2002). Nutrient-dependent expression of insulin-like peptides from neuroendocrine cells in the CNS contributes to growth regulation in *Drosophila*. *Curr. Biol.* **12**, 1293-1300.
- Jünger, M. A., Rintelen, F., Stocker, H., Wasserman, J. D., Végh, M., Radimerski, T., Greenberg, M. E. and Hafen, E. (2003). The *Drosophila* forkhead transcription factor FOXO mediates the reduction in cell number associated with reduced insulin signaling. *J. Biol.* **2**, 20.
- Kaplowitz, P. B. (2008). Link between body fat and the timing of puberty. *Pediatrics* **121** Suppl. 3, S208-S217.
- Kim, J. and Neufeld, T. P. (2015). Dietary sugar promotes systemic TOR activation in *Drosophila* through AKH-dependent selective secretion of Dilp3. *Nat. Commun.* **6**, 6846.
- King-Jones, K. and Thummel, C. S. (2005). Nuclear receptors—a perspective from *Drosophila*. *Nat. Rev. Genet.* **6**, 311-323.
- Kley, H. K., Deselaers, T., Peerenboom, H. and Krüskenper, H. L. (1980). Enhanced conversion of androstenedione to estrogens in obese males. *J. Clin. Endocrinol. Metab.* **51**, 1128-1132.
- Koyama, T. and Mirth, C. K. (2016). Growth-blocking peptides as nutrition-sensitive signals for insulin secretion and body size regulation. *PLoS Biol.* **14**, e1002392.
- Layalle, S., Arquier, N. and Léopold, P. (2008). The TOR pathway couples nutrition and developmental timing in *Drosophila*. *Dev. Cell* **15**, 568-577.
- Li, W., Liu, Q., Deng, X., Chen, Y., Liu, S. and Story, M. (2017). Association between obesity and puberty timing: a systematic review and meta-analysis. *Int. J. Environ. Res. Public Health* **14**, 1266.
- McKay, L. I. and Cidowski, J. A. (2003). Physiologic and pharmacologic effects of corticosteroids. In *Holland-Frei Cancer Medicine*, 6th edn (ed. D. W. Kufe, R. E. Pollock, R. R. Weichselbaum et al.). Hamilton: BC Decker.
- Metzstein, M. M. and Krasnow, M. A. (2006). Functions of the nonsense-mediated mRNA decay pathway in *Drosophila* development. *PLoS Genet.* **2**, e180.
- Mirth, C., Truman, J. W. and Riddiford, L. M. (2005). The role of the prothoracic gland in determining critical weight for metamorphosis in *Drosophila melanogaster*. *Curr. Biol.* **15**, 1796-1807.
- Mirth, C. K., Truman, J. W. and Riddiford, L. M. (2009). The ecdysone receptor controls the post-critical weight switch to nutrition-independent differentiation in *Drosophila* wing imaginal discs. *Development* **136**, 2345-2353.
- Nässel, D. R. and Vanden Broeck, J. (2016). Insulin/IGF signaling in *Drosophila* and other insects: factors that regulate production, release and post-release action of the insulin-like peptides. *Cell. Mol. Life Sci.* **73**, 271-290.
- Niwa, R., Namiki, T., Ito, K., Shimada-Niwa, Y., Kiuchi, M., Kawaoka, S., Kayukawa, T., Banno, Y., Fujimoto, Y., Shigenobu, S. et al. (2010). Non-moulting *glossy/shroud* encodes a short-chain dehydrogenase/reductase that functions in the 'Black Box' of the ecdysteroid biosynthesis pathway. *Development* **137**, 1991-1999.
- Noriega, F. G. (2014). Juvenile hormone biosynthesis in insects: what is new, what do we know, and what questions remain? *Int. Sch. Res. Notices* **2014**, 967361.
- Ohhara, Y., Kobayashi, S. and Yamanaka, N. (2017). Nutrient-dependent endocycling in steroidogenic tissue dictates timing of metamorphosis in *Drosophila melanogaster*. *PLoS Genet.* **13**, e1006583.
- Okamoto, N. and Nishimura, T. (2015). Signaling from glia and cholinergic neurons controls nutrient-dependent production of an insulin-like peptide for *drosophila* body growth. *Dev. Cell* **35**, 295-310.
- Ono, H. (2014). Ecdysone differentially regulates metamorphic timing relative to 20-hydroxyecdysone by antagonizing juvenile hormone in *Drosophila melanogaster*. *Dev. Biol.* **391**, 32-42.
- Ono, H., Rewitz, K. F., Shinoda, T., Itoyama, K., Petryk, A., Rybczynski, R., Jarcho, M., Warren, J. T., Marqués, G., Shimell, M. J. et al. (2006). *Spook* and *Spookier* code for stage-specific components of the ecdysone biosynthetic pathway in Diptera. *Dev. Biol.* **298**, 555-570.
- Ou, Q., Magico, A. and King-Jones, K. (2011). Nuclear receptor DHR4 controls the timing of steroid hormone pulses during *Drosophila* development. *PLoS Biol.* **9**, e1001160.
- Park, S., Alfa, R. W., Topper, S. M., Kim, G. E. S., Kockel, L. and Kim, S. K. (2014). A genetic strategy to measure circulating *Drosophila* insulin reveals genes regulating insulin production and secretion. *PLoS Genet.* **10**, e1004555.
- Parvy, J.-P., Wang, P., Garrido, D., Maria, A., Blais, C., Poidevin, M. and Montagne, J. (2014). Forward and feedback regulation of cyclic steroid production in *Drosophila melanogaster*. *Development* **141**, 3955-3965.
- Pasco, M. Y. and Léopold, P. (2012). High sugar-induced insulin resistance in *Drosophila* relies on the *Lipocalin* neural Lazarillo. *PLoS ONE* **7**, e36583.
- Petryk, A., Warren, J. T., Marqués, G., Jarcho, M. P., Gilbert, L. I., Kahler, J., Parvy, J.-P., Li, Y., Dauphin-Villemant, C. and O'Connor, M. B. (2003). Shade is the *Drosophila* P450 enzyme that mediates the hydroxylation of ecdysone to the steroid insect molting hormone 20-hydroxyecdysone. *Proc. Natl. Acad. Sci. USA* **100**, 13773-13778.
- Pfeiffer, B. D., Jenett, A., Hammonds, A. S., Ngo, T.-T. B., Misra, S., Murphy, C., Scully, A., Carlson, J. W., Wan, K. H., Lavery, T. R. et al. (2008). Tools for neuroanatomy and neurogenetics in *Drosophila*. *Proc. Natl. Acad. Sci. USA* **105**, 9715-9720.
- Polari, L., Yarkin, E., Martínez Chacón, M. G., Ahotupa, M., Smeds, A., Strauss, L., Zhang, F., Poutanen, M., Saarinen, N. and Mäkelä, S. I. (2015). Weight gain and inflammation regulate aromatase expression in male adipose tissue, as evidenced by reporter gene activity. *Mol. Cell. Endocrinol.* **412**, 123-130.
- Post, S., Karashchuk, G., Wade, J. D., Sajid, W., De Meyts, P. and Tatar, M. (2018). *Drosophila* Insulin-like peptides DILP2 and DILP5 differentially stimulate cell signaling and glycogen phosphorylase to regulate longevity. *Front. Endocrinol.* **9**, 245.
- Rajan, A. and Perrimon, N. (2012). *Drosophila* cytokine unpaired 2 regulates physiological homeostasis by remotely controlling insulin secretion. *Cell* **151**, 123-137.
- Rewitz, K. F., Yamanaka, N. and O'Connor, M. B. (2013). Developmental checkpoints and feedback circuits time insect maturation. *Curr. Top. Dev. Biol.* **103**, 1-33.
- Rulifson, E. J., Kim, S. K. and Nusse, R. (2002). Ablation of insulin-producing neurons in flies: growth and diabetic phenotypes. *Science* **296**, 1118-1120.
- Sano, H., Nakamura, A., Texada, M. J., Truman, J. W., Ishimoto, H., Kamikouchi, A., Nibu, Y., Kume, K., Ida, T. and Kojima, M. (2015). The nutrient-responsive hormone CCHamide-2 controls growth by regulating insulin-like peptides in the brain of *Drosophila melanogaster*. *PLoS Genet.* **11**, e1005209.
- Schindelin, J., Arganda-Carreras, I., Frise, E., Kaynig, V., Longair, M., Pietzsch, T., Preibisch, S., Rueden, C., Saalfeld, S., Schmid, B. et al. (2012). Fiji: an open-source platform for biological-image analysis. *Nat. Methods* **9**, 676-682.
- Schneider, C. A., Rasband, W. S. and Eliceiri, K. W. (2012). NIH image to imageJ: 25 years of image analysis. *Nat. Methods* **9**, 671-675.
- Schubiger, M., Carré, C., Antoniewski, C. and Truman, J. W. (2005). Ligand-dependent de-repression via EcR/USP acts as a gate to coordinate the differentiation of sensory neurons in the *Drosophila* wing. *Development* **132**, 5239-5248.
- Seidl, M. and Pirke, K.-M. (1987). Testosterone metabolism in the medial basal hypothalamus of the starved male rat. *J. Steroid Biochem.* **26**, 407-411.
- Shingleton, A. W., Das, J., Vinicius, L. and Stern, D. L. (2005). The temporal requirements for insulin signaling during development in *Drosophila*. *PLoS Biol.* **3**, e289.
- Slaidina, M., Delanoue, R., Gronke, S., Partridge, L. and Léopold, P. (2009). A *Drosophila* insulin-like peptide promotes growth during nonfeeding states. *Dev. Cell* **17**, 874-884.
- Stipp, D. (2011). Linking nutrition, maturation and aging: from thrifty genes to the spendthrift phenotype. *Aging* **3**, 85-93.
- Süren-Castillo, S., Abrisqueta, M. and Maestro, J. L. (2012). FoxO inhibits juvenile hormone biosynthesis and vitellogenin production in the German cockroach. *Insect Biochem. Mol. Biol.* **42**, 491-498.
- Tanaka, Y. (1995). The different effects of ecdysone and 20-hydroxyecdysone on the induction of larval ecdysis in the silkworm, *Bombyx mori* (Lepidoptera: Bombycidae). *Eur. J. Entomol.* **92**, 155-160.
- Tanaka, Y. and Takeda, S. (1993). Ultramarine larval ecdyses of the silkworm, *Bombyx mori* induced by ecdysone. *Naturwissenschaften* **80**, 131-132.
- Tennessen, J. M. and Thummel, C. S. (2011). Coordinating growth and maturation—insights from *Drosophila*. *Curr. Biol.* **21**, R750-R757.
- Terashima, J., Takaki, K., Sakurai, S. and Bownes, M. (2005). Nutritional status affects 20-hydroxyecdysone concentration and progression of oogenesis in *Drosophila melanogaster*. *J. Endocrinol.* **187**, 69-79.

- Varghese, J., Lim, S. F. and Cohen, S. M. (2010). *Drosophila* miR-14 regulates insulin production and metabolism through its target, *sugarbabe*. *Genes Dev.* **24**, 2748-2753.
- Wagner, I. V., Sabin, M. A., Pfäffle, R. W., Hiemisch, A., Sergeev, E., Körner, A. and Kiess, W. (2012). Effects of obesity on human sexual development. *Nat. Rev. Endocrinol.* **8**, 246-254.
- Warren, J. T., Petryk, A., Marqués, G., Jarcho, M., Parvy, J.-P., Dauphin-Villemant, C., O'Connor, M. B. and Gilbert, L. I. (2002). Molecular and biochemical characterization of two P450 enzymes in the ecdysteroidogenic pathway of *Drosophila melanogaster*. *Proc. Natl. Acad. Sci. USA* **99**, 11043-11048.
- Warren, J. T., Petryk, A., Marqués, G., Jarcho, M., Parvy, J.-P., Shinoda, T., Itoyama, I., Kobayashi, J., Jarcho, M., Li, L. et al. (2004). *Phantom* encodes the 25-hydroxylase of *Drosophila melanogaster* and *Bombyx mori*: a P450 enzyme critical in ecdysone biosynthesis. *Insect Biochem. Mol. Biol.* **34**, 991-1010.
- Wilcox, G. (2005). Insulin and insulin resistance. *Clin. Biochem. Rev.* **26**, 19-39.
- Wong, D. M., Shen, Z., Owyang, K. E. and Martinez-Agosto, J. A. (2014). Insulin- and warts-dependent regulation of tracheal plasticity modulates systemic larval growth during hypoxia in *Drosophila melanogaster*. *PLoS ONE* **9**, e115297.
- Yamanaka, N., Rewitz, K. F. and O'Connor, M. B. (2013). Ecdysone control of developmental transitions: lessons from *Drosophila* research. *Annu. Rev. Entomol.* **58**, 497-516.
- Yamanaka, N., Marqués, G. and O'Connor, M. B. (2015). Vesicle-mediated steroid hormone secretion in *Drosophila melanogaster*. *Cell* **163**, 907-919.
- Yoshiyama, T., Namiki, T., Mita, K., Kataoka, H. and Niwa, R. (2006). Neverland is an evolutionary conserved Rieske-domain protein that is essential for ecdysone synthesis and insect growth. *Development* **133**, 2565-2574.
- Yu, Y., Sun, Y., He, S., Yan, C., Rui, L., Li, W. and Liu, Y. (2012). Neuronal Cbl controls biosynthesis of Insulin-like peptides in *Drosophila melanogaster*. *Mol. Cell. Biol.* **32**, 3610-3623.
- Zar, J. H. (1984). Comparing simple linear regression equations. In *Biostatistical Analysis*, 2nd edn, pp. 360-376. Prentice-Hall.
- Zhang, Y. Q., Rodesch, C. K. and Broadie, K. (2002). Living synaptic vesicle marker: synaptotagmin-GFP. *Genesis* **34**, 142-145.
- Zhang, H., Liu, J., Li, C. R., Momen, B., Kohanski, R. A. and Pick, L. (2009). Deletion of *Drosophila* insulin-like peptides causes growth defects and metabolic abnormalities. *Proc. Natl. Acad. Sci. USA* **106**, 19617-19622.
- Zheng, H., Yang, X. and Xi, Y. (2016). Fat body remodeling and homeostasis control in *Drosophila*. *Life Sci.* **167**, 22-31.
